---

# HIERARCHICAL MARKOV RANDOM FIELD MODEL CAPTURES SPATIAL DEPENDENCY IN GENE EXPRESSION, DEMONSTRATING REGULATION VIA THE 3D GENOME

---

**Naihui Zhou**

Bioinformatics and Computational Biology Graduate Program

Iowa State University

Ames, IA, USA

nzhou@iastate.edu

**Iddo Friedberg**

Department of Veterinary Microbiology and Preventive Medicine

Iowa State University

Ames, IA, USA

idoerg@iastate.edu

**Mark S. Kaiser**

Department of Statistics

Iowa State University

Ames, IA, USA

mskaiser@iastate.edu

February 17, 2020

## ABSTRACT

HiC technology has revealed many details about the eukaryotic genome's complex 3D architecture. It has been shown that the genome is separated into organizational structures which are associated with gene expression. However, to the best of our knowledge, no studies have quantitatively measured the level of gene expression in the context of the 3D genome.

Here we present a novel model that integrates data from RNA-seq and HiC experiments, and determines how much of the variation in gene expression can be accounted for by the genes' spatial locations. We used Poisson hierarchical Markov Random Field (PhiMRF), to estimate the level of spatial dependency among protein-coding genes in two different human cell lines. The inference of PhiMRF follows a Bayesian framework, and we introduce the Spatial Interaction Estimate (SIE) to measure the strength of spatial dependency in gene expression.

We find that the quantitative expression of genes in some chromosomes show meaningful positive intra-chromosomal spatial dependency. Interestingly, the spatial dependency is much stronger than the dependency based on linear gene neighborhoods, suggesting that 3D chromosome structures such as chromatin loops and Topologically Associating Domains (TADs) are strongly associated with gene expression levels. In some chromosomes the spatial dependency in gene expression is only detectable when the spatial neighborhoods are confined within TADs, suggesting TAD boundaries serve as insulating barriers for spatial gene regulation in the genome. We also report high inter-chromosomal spatial correlations in the majority of chromosome pairs, as well as the whole genome. Some functional groups of genes show strong spatial dependency in gene expression as well, providing new insights into the regulation mechanisms of these molecular functions. This study both confirms and quantifies widespread spatial correlation in gene expression. We propose that, with the growing influx of HiC data complementing gene expression data, the use of spatial dependence should be an integral part of the toolkit in the computational analysis of the relationship between chromosome structure and gene expression.

1 **Keywords** HiC · nuclear organization · gene expression · Markov random field · RNA-seq

## 2 **1 Introduction**

3 The 3D genome organization plays an important role in gene expression through various mechanisms [1, 2, 3, 4]. Of  
4 special interest is how genes in close spatial proximity coordinate expression. Several molecular models involving  
5 different organizational hierarchies have been proposed to explain this phenomenon [4]. One such hypothesis is that of  
6 *transcription factories*, where RNA polymerase II is significantly enriched to allow efficient transcription of multiple  
7 genes at the same foci [5, 6, 7].

8 Another molecular model for spatial gene clusters hypothesizes that the spatial cluster are brought together to allow  
9 their promoters to interact with enhancers [8, 9]. The  $\text{TNF}\alpha$ -induced multigene complex regulated by  $\text{NF-}\kappa\text{B}$  is  
10 disrupted once the chromatin loops for the complex are cleaved [10], potentially explained by the fact that these genes  
11 are dependent on  $\text{NF-}\kappa\text{B}$ -responsive enhancers [11]. Indeed, genes sharing common regulatory elements through a  
12 promoter interaction network are spatially co-localized with correlated expression levels [12].

13 Many of the aforementioned studies are made possible following the advent of Chromosomal Conformation Capture  
14 (3C) [13] and subsequent 4C [14, 15], HiC [16, 11, 17] and Capture HiC [12, 9] technologies. These advances allow for  
15 a global overview of the genomic architecture instead of individual loci. HiC has enabled or confirmed discoveries of a  
16 hierarchy of organizational structures, from Topologically Associating Domains (TAD) [18], to A/B compartments [16]  
17 and Chromosomal Territories (CT) [19]. There is a known general association between these structures and gene  
18 expression [3, 20]. For example, the A compartments of the genome are more gene dense and are more actively  
19 transcribing [16]. Moreover, disrupting TAD boundaries may result in disruption in expression [21].

20 Several whole-genome computational studies have attempted to untangle the relationship between gene co-expression  
21 and their spatial organization. Inter-chromosomal co-expression is significantly enhanced for genes with spatial contacts  
22 in yeast [22], and gene interaction networks can predict co-expression well [23]. Gene pair functional similarity is also  
23 correlated with spatial distance [24]. However, these studies represented the expression as a pairwise property, either  
24 co-expression or co-functionality, but do not model actual expression levels. Even though these studies confirm that  
25 there is a general trend of co-localization for co-regulated, co-expressed or co-functional genes, none of them provide a  
26 probabilistic model for gene expression levels within a genome. At the same time, many routine analyses in RNA-seq  
27 data, rely heavily on a good probabilistic model of gene expression [25, 26, 27]. The between-sample probability that  
28 these methods model is dependent on the between-gene variation in the genome, which can be further modeled given  
29 more explanatory data, such as spatial location. This added correlation between the genes in one sample could improve  
30 the performance of differential expression analyses tools.

31 We have developed a probabilistic model, **PhiMRF (Poisson hierarchical Markov Random Field)** that integrates spatial  
32 location and gene expression. We further introduce the *Spatial Interaction Estimate*, or SIE, a measure whose value  
33 indicates the strength of spatial dependency of gene expression. SIE can be thought of as analogous to the more familiar  
34 regression slope ( $\beta$ ). While the slope measures the correlation between two variables, SIE measures the strength of  
35 spatial dependency of gene expression. Using PhiMRF, we quantify spatial dependency of gene expression for all  
36 chromosomes, as well as for select functional gene groups. The ability to quantify spatial dependence is a considerable  
37 advance in understanding the spatial component in the regulation of gene expression. PhiMRF can be used to explore  
38 the 3D regulation mechanism of any gene group of interest. With the advent of HiC data regularly added to genomic and  
39 transcriptomic data, it is expected that interrogating novel mechanisms of regulation based on the 3D genome structure  
40 will become possible and widely used. The statistical framework developed in this work, and PhiMRF provide the  
41 means to do so.

## 42 2 Results

### 43 2.1 Hierarchical Markov Random Field Model

44 PhiMRF attributes the variation in gene expression (observed in  $k$  replicates) to the genes' 3D locations (observed via  
 45 HiC experimnts) using an autoregression-based model (Figure 1). Autoregressive (AR) models are used to explain  
 46 variation for data observed in spatial or temporal settings by modeling the distribution of an observation as dependent  
 47 on its past (time series) or on its spatial neighbors. We extract a neighborhood network for gene locations in 3D space  
 48 from HiC data (Figure 1), where a gene is mapped to all of its overlapping loci (Supplementary Figure S1), and its  
 spatial proximity to another gene is calculated as the summary of all of the loci pairs the two gene covers (Methods).

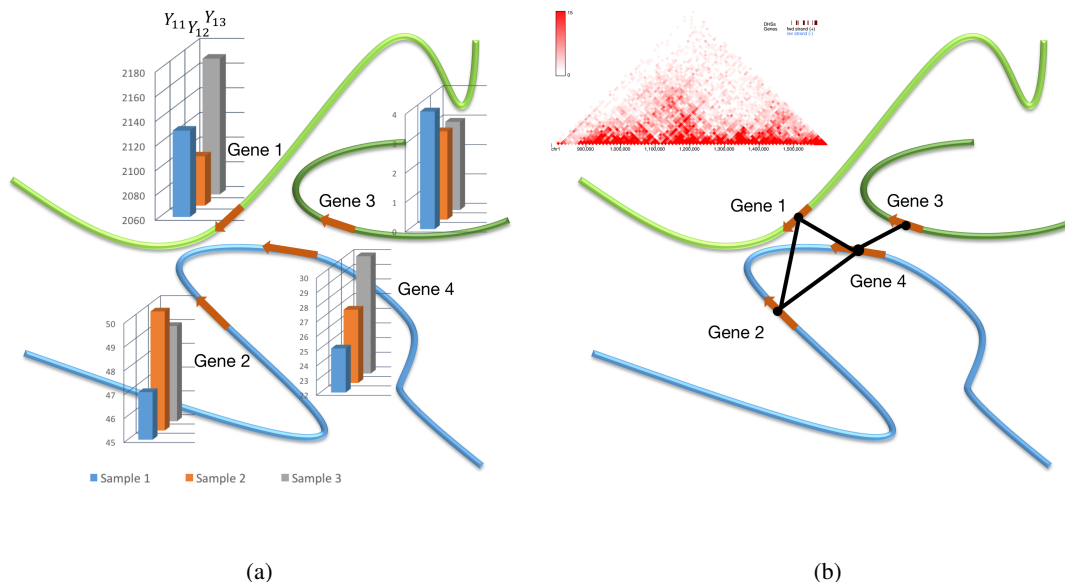

Figure 1: **Overall Scheme of the PhiMRF model applied to RNA-seq and HiC data.** (a) Replicates of RNA-seq quantification can be observed at each gene. (b) A spatial gene network is inferred from HiC data. Each gene is treated as a node in the network. An edge exists between two genes if the spatial interaction frequency between loci overlapping with the two genes is higher than a threshold. See Methods for detailed description of the network inference. The triangular HiC heat map is generated using the 3D genome browser [28] with data from Rao *et al* [17].

49

50 Our Poisson Hierarchical Markov Random Field (PhiMRF) model is briefly described below (For a detailed description,  
 51 see Methods and Supplementary Methods). Let  $Y_{ik}$  be the random variable connected with the RNA-seq count for  
 52 gene  $i$  (located at location  $s_i$ ) from sample  $k$ ,  $i = 1, 2, \dots, n$ ;  $k = 1, 2, \dots, M$ .  $Y_{ik}$  is modelled with a Poisson  
 53 distribution [29], with its parameter  $\lambda_i$ , i.e.  $Y_{ik} \sim \text{Poisson}(\lambda_i)$ . Let  $w_i = \log(\lambda_i)$ . We **conditionally** specify the  
 54 distribution for  $w_i$  as,

$$w_i | \mathbf{w}(N_i) \sim N(\mu_i, \tau^2) \quad (1)$$

where  $N_i$  is the set of locations neighboring  $s_i$ :  $N_i = \{s_j : s_j \text{ is a neighbor of } s_i\}$  and  $w(N_i) = \{w_j : s_j \text{ is a neighbor of } s_i\}$ . Equation 1 is a conditionally specified model, its mean is further modelled as in Equation 2:

$$\mu_i = \alpha + \eta \sum_{j \in N_i} \frac{1}{|N_i| + |N_j|} (w_j - \alpha). \quad (2)$$

Throughout this study, the posterior distribution of  $\eta$  helps us to understand the strength of the spatial dependency. The main properties of the posterior  $\eta$  distribution that are the mean ( $\hat{\eta}$ ) and the 95% credible interval, which is obtained as the 2.5% and 97.5% quantiles of the simulated posterior distribution. We will refer to the estimated posterior mean of  $\eta$  ( $\hat{\eta}$ ) as the **Spatial Interaction Estimate (SIE)**. If the 95% posterior credible interval for  $\eta$  does not contain 0, we say that there is meaningful spatial dependency. The two other unknown parameters in this model are  $\alpha$  and  $\tau^2$ , where  $\alpha$  is connected with a basal expression rate for all genes. The parameter  $\tau^2$  is connected with the conditional Gaussian variance, which accounts for any remaining variance in gene expression within a sample. The same properties (mean, 2.5% and 97.5% quantiles) are used to summarize their posterior distributions.

In summary, PhiMRF models gene expression with a conditional Poisson-lognormal mixture, and an autoregressive model with a parameter  $\eta$  that is connected with spatial dependency. We applied Bayesian inference that allowed us to simulate from the posterior distributions of  $\eta$ , resulting in the Spatial Interaction Estimate (SIE) that symbolizes the strength of the spatial dependency.

## 2.2 Intra-chromosomal dependency

**Within each chromosome.** We ran PhiMRF on all genes in each of the 23 human chromosomes (Y chromosome excluded) in the IMR90 cell, with the spatial gene networks inferred from intra-chromosomal HiC data with 10kb resolution [17]. We also implemented a linear baseline for each chromosome. The baseline takes the same gene expression data for each gene but the spatial network is simply inferred from genes within 10k base pairs of each other in the linear chromosome. By comparing our data with this baseline dataset, we can observe whether the long-range, non-linear interactions do play a role in gene expression. We found strong evidence of positive spatial dependency in eleven chromosomes: 1, 4, 5, 6, 8, 9, 12, 19, 20, 21 and X, with SIEs higher than the linear baseline (Figure 2a, Supplementary Tables S1 and S2). This suggested genes in these chromosomes are co-dependent on their neighbors when it comes to gene expression, proving that genes that are spatially close have coordinated expression patterns on a global scale. We noticed that although in all these eleven chromosomes the 95% credible interval of  $\eta$  is greater than zero, their ranges vary greatly. Although these SIEs are all larger than their linear counterpart, the intervals do not suggest that the difference between HiC and linear is statistically significant, except in Chromosomes 1, 9 and 21. However, the differences in these SIEs should not be quantitatively compared (e.g. measuring the difference or ratio of these SIE's), as they all have different number of genes and connectivity. There does not seem to be correlation between the parameter estimates from the PhiMRF model and the network size or connectivity (Figure 2a, top).

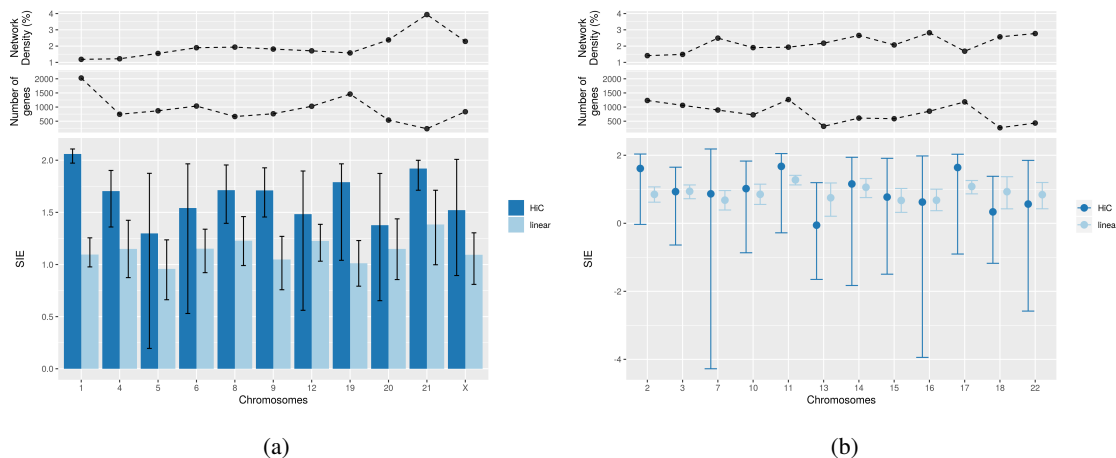

**Figure 2: Spatial Interaction Estimate (SIE) for whole chromosomes.** Top panels depicts the network properties of each chromosome. Network density is defined as the percentage of actual edges versus number of possible edges. **(a)** Chromosomes with 95% credible interval above zero. Height of bar is SIE, and error bars are the 2.5% and 97.5% quantiles from the posterior distributions. **(b)** Chromosomes with 95% credible interval including 0. Error bars are the 2.5% and 97.5% quantiles from the posterior distributions.

83 Twelve chromosomes did not show meaningful spatial dependency in gene expression (Figure 2b, Supplementary  
 84 Tables S1 and S2). Despite only half of the chromosomes showing 3D spatial dependency, all 23 chromosomes show  
 85 meaningful positive linear dependency in gene expression. In other words, the expression level of a gene is predictive  
 86 of the expression levels of (at most) two other genes that are within 10k base pairs upstream or downstream from it.  
 87 This is a confirmation for the efficacy of our model as it suggests that the linear dependency in gene expression is stable  
 88 and detectable, in line with our existing perception of the transcription mechanism. All chromosomes have comparable  
 89 estimated basal expression rates and conditional variance (Supplementary Table S1). The large estimated conditional  
 90 variance is indicative of the large variation in gene expression within a chromosome.

91 **Within Topologically Associating Domains.** Topologically Associating Domains (TAD) are megabase-sized spatial  
 92 structures in the chromosomes observed from HiC data, displaying significantly more frequent interactions within than  
 93 outside these domains [18] (Figure 3a). Evidence shows that enhancer-promoter interactions are constrained within  
 94 TADs [11], and genes within TADs are more active in transcription than genes in TAD boundaries [18]. However, it is  
 95 unclear how TAD structures causally affect gene expression levels, especially on a global scale, instead of individual  
 96 cases [30, 21]. Here we investigate the level of gene expression spatial dependency for genes located within TAD  
 97 boundaries (Supplementary Table S3). We used Arrowhead[17] as our TAD caller, while several algorithms are available  
 98 for the computational identification of TADs based on HiC data with varying levels of accuracy [31].

99 Genes within TADs show more network clustering [32], but do not seem to exhibit extreme hub nodes versus non-TAD  
 100 genes (Supplementary Figure S2). To further investigate the genes within TADs, we isolated those edges that are  
 101 located within TADs as well, i.e. interactions that connect two genes within the same TAD. About half of the degree for  
 102 genes located within TADs are intra-TAD edges (Figure 3b, top). Then we ran PhiMRF to detect spatial dependency of  
 103 gene expression on these TAD genes, using only the edges within each individual TAD (**intra-TAD** edges), where the

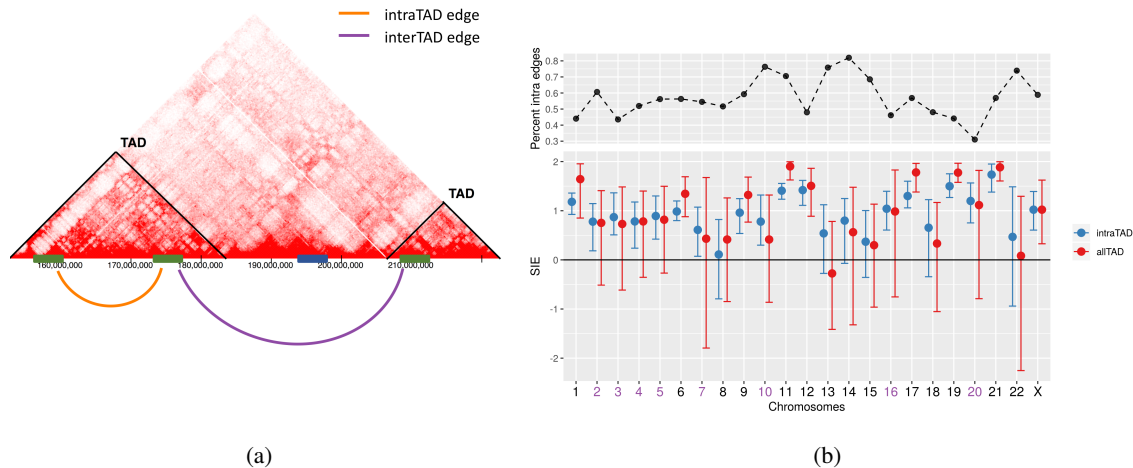

Figure 3: **Spatial dependency in TAD gene expression.** (a) Illustration of intra-TAD edges. (b) SIE of TAD genes using intraTAD versus allTAD edges. Blue: only includes edges within one TAD (intraTAD). Green: includes all edges connecting all TAD genes (allTAD).

104 network is essentially made up of a group of connected components that represent each TAD. Seventeen chromosomes,  
 105 with the exception of 8, 13, 14, 15, 18, 22, show meaningful spatial dependency when only including intra-TAD edges,  
 106 while only nine chromosomes show positive spatial dependency when including both intra-TAD and inter-TAD edges.  
 107 We also ran the model on TAD genes with only **inter-TAD** edges, to rule out the possibility that the difference in SIE is  
 108 due the number of edges in the network. The dataset using inter-TAD edges display similar results as the dataset using  
 109 all edges (Supplementary Figure S3). We therefore conclude that for some chromosomes, limiting the interactions to  
 110 within each TAD results in a more detectable effect of spatial dependency. Intra-TAD interactions are more important  
 111 than inter-TAD interactions when it comes to regulating coordinated gene expression levels. Such effects might be a  
 112 result of TAD boundaries acting as insulating barriers.

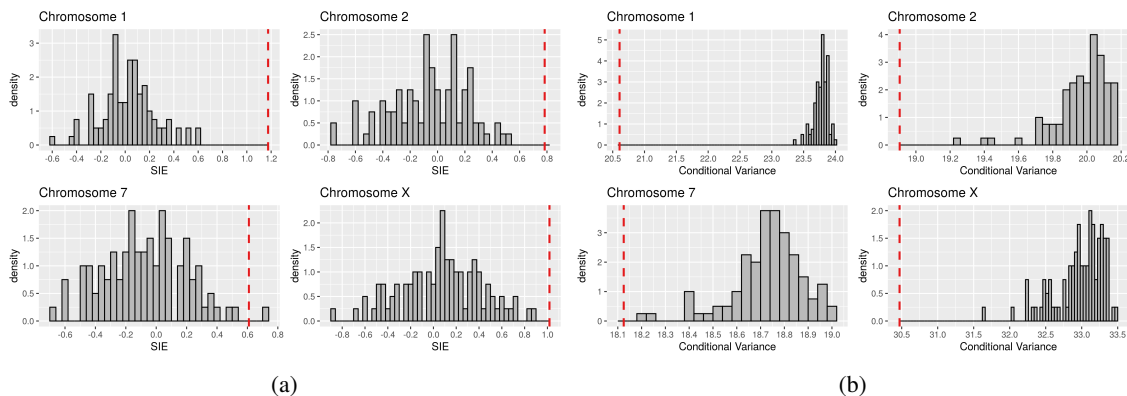

Figure 4: **Permutation test for spatial dependency in TAD gene expression.**(a) Histogram of SIE for 100 randomly permuted networks for all TAD genes in four chromosomes. Red dashed line is the observed SIE from the non-random HiC network. (b) Histogram of  $\tau^2$  for 100 randomly permuted networks for all TAD genes in four chromosomes. Red dashed line is the observed  $\tau^2$  from the non-random HiC network. The permutation is carried out using an Erdős-Rényi algorithm with equal probability for any possible edge to be sampled. Total number of actual edges in each random graph is equal to the number of intra-TAD edges in the observed HiC network.

113 To completely rule out the effect of neighborhood size (edge count), and to further validate our model, in the next step,  
114 we carried out an *in silico* experiment to disrupt the TAD boundaries by randomly sampling edges in our HiC network.  
115 In other words, we randomly permuted the order of the edges in each HiC network to create a reference distribution.  
116 For each of these 100 random samples, edges are randomly designated between any two genes. The total number of  
117 random edges is equal to the number of intra-TAD edges. We then fit PhiMRF for all 100 networks and obtain the  
118 SIE's (Figure 4, Supplementary Figure S4). For most chromosomes, the SIE from our observed model is significantly  
119 higher than our reference distribution built from 100 randomly sampled networks. Moreover, the observed PhiMRF  
120 model often reports significantly lower remaining conditional variance when compared with randomly permuted  
121 networks. This is because some of the variance is accounted for by the spatial dependency, through the observed HiC  
122 network. At the same time, the randomly permuted networks cannot account for the spatial dependency, therefore  
123 having higher estimated variance. This serves as a validation that PhiMRF is picking up real spatial dependency signal  
124 instead of noise in the data. More importantly, the permutations could be viewed as a disruption of TAD boundaries,  
125 artificially connecting genes located in different TADs together. The PhiMRF results of such disruption demonstrated  
126 that these artificial connections could not explain the variation of gene expression. Therefore, we have proven the native  
127 organization of TADs is non-random and has significant effects in gene expression.

### 128 **2.3 Inter-chromosomal dependency**

129 Many HiC studies are focused on intra-chromosomal interactions since chromatin looping and TADs are important  
130 mechanisms for gene regulation [11, 17]. Moreover, it was initially observed that different chromosomes tend to occupy  
131 different territories in the nucleus with rare inter-chromosomal interactions [33]. Despite the discrete chromosome  
132 territories, there are about 5-10% of chromosome intermingling [34], and intermingling has a strong correlation with  
133 gene expression [35, 36]. The inter-chromosomal HiC gene networks are derived the same way as the intra-chromosomal  
134 ones, but only using inter-chromosomal HiC interactions. In other words, no two genes from the same chromosome are  
135 considered to be connected. For a total of 253 pairs of chromosomes, only 32 (12.64%) pairs do not show meaningful  
136 positive spatial dependency. In general, the lower the SIE, the larger the intervals (Figure 5, Supplementary Table S4).  
137 When spatial dependency is less detectable, it manifested in both the effect sizes and the statistical significance. The  
138 chromosome pair with the highest SIE is Chromosome 9 and Chromosome 21, followed by Chromosome 9 and  
139 Chromosome 13. Some evidence suggests that Chromosome 9 is located in the center of the nucleus [37], which may  
140 explain the high inter-chromosomal spatial dependency of its gene expression. Another chromosome that appeared  
141 twice in the top ten list is chromosome 19, which has also been shown to locate in the center of the nucleus [38].  
142 Chromosome 1 is the only chromosome that appeared three times in the top ten list, which might be attributed to its  
143 exceptional length and gene count. We then incorporated all inter-chromosomal and intra-chromosomal HiC edges  
144 to all 19631 genes in the genome. Among the total 2,368,756 edges, 176,282 (7.44%) are intra-chromosomal edges.  
145 The global gene network has a SIE of 2.561(2.551, 2.570), confirming spatial dependency of gene expression as a



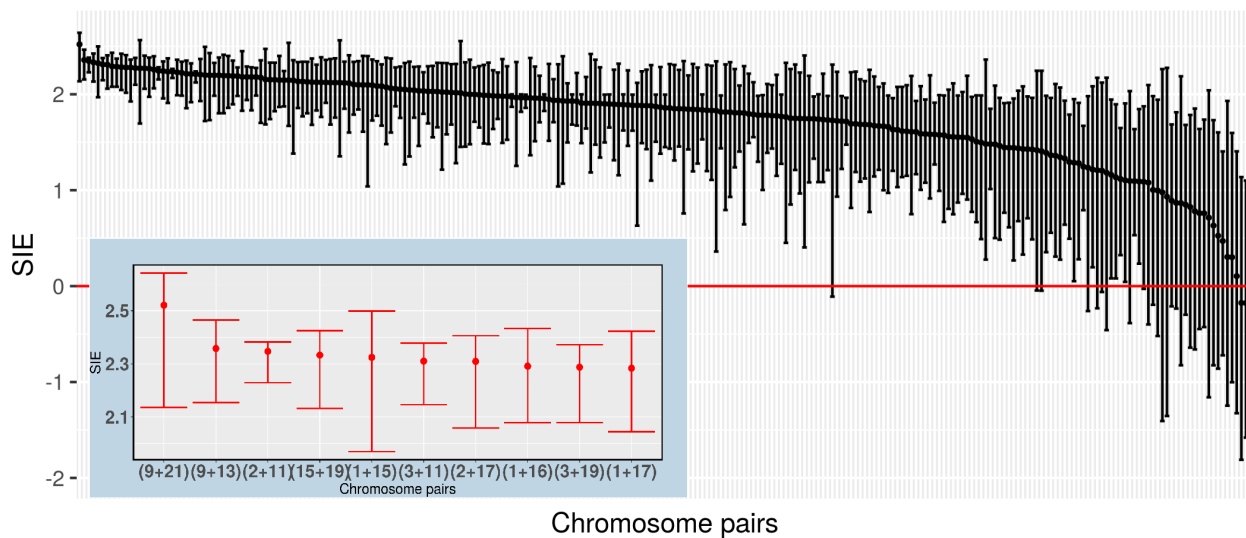

Figure 5: **SIE of chromosome pairs using only inter-chromosomal HiC interactions.** For each pair of chromosomes, PhiMRF ran on a dataset where all genes in both chromosomes are included, while only inter-chromosomal edges are included. From left to right, chromosome pairs ranked by highest SIE to lowest. **Background:** SIE and 95% credible interval of all 253 chromosome pairs. **Zoomed overlay:** SIE and 95% credible interval of the top ten chromosome pairs with the highest SIE.

146 global effect, observed in the whole genome. The global dataset has a basal expression rate of 3.039 (2.909, 3.176) and  
147 conditional variance of 22.337 (21.607, 23.227).

## 148 2.4 Functional gene groups

149 Next we tested the hypothesis that spatial dependency of gene expression is correlated with the function of the genes.  
150 Evidence suggest that co-functioning genes tend to cluster in space, and function is closely correlated with expression  
151 levels, since co-functioning genes sometimes need to be co-transcribed [39, 22].

152 Having developed the PhiMRF framework to understand the relationship between expression and spatial organization,  
153 we can apply it to any group of genes, to see whether spatial dependency is particularly strong for certain functions,  
154 pathways or phenotypes. The implication of a large SIE for a functional group is that the 3D organization of the  
155 genome plays a role in the regulation of such function. Here we demonstrate this application of PhiMRF using the  
156 Gene Ontology (GO) consortium as the controlled vocabulary for functional annotation.

157 We picked the top fifteen GO terms by count in the Biological Process aspect of GO (BPO) and collected all the genes  
158 associated with each GO term (Supplementary Table S5). These terms include functions like transcription regulation,  
159 protein phosphorylation etc. The size of the gene groups varies from 504 genes to 167 genes.

160 Groups of genes associated with positive/ negative regulation of transcription by RNA polymerase II (GO:0045944,  
161 GO:0000122), G protein-coupled receptor signaling pathway (GO:0007186), neutrophil degranulation (GO:0043312),  
162 and negative regulation of cell population proliferation (GO:0008285) shows statistically meaningful spatial dependency  
163 (Figure 6, Supplementary Table S6).

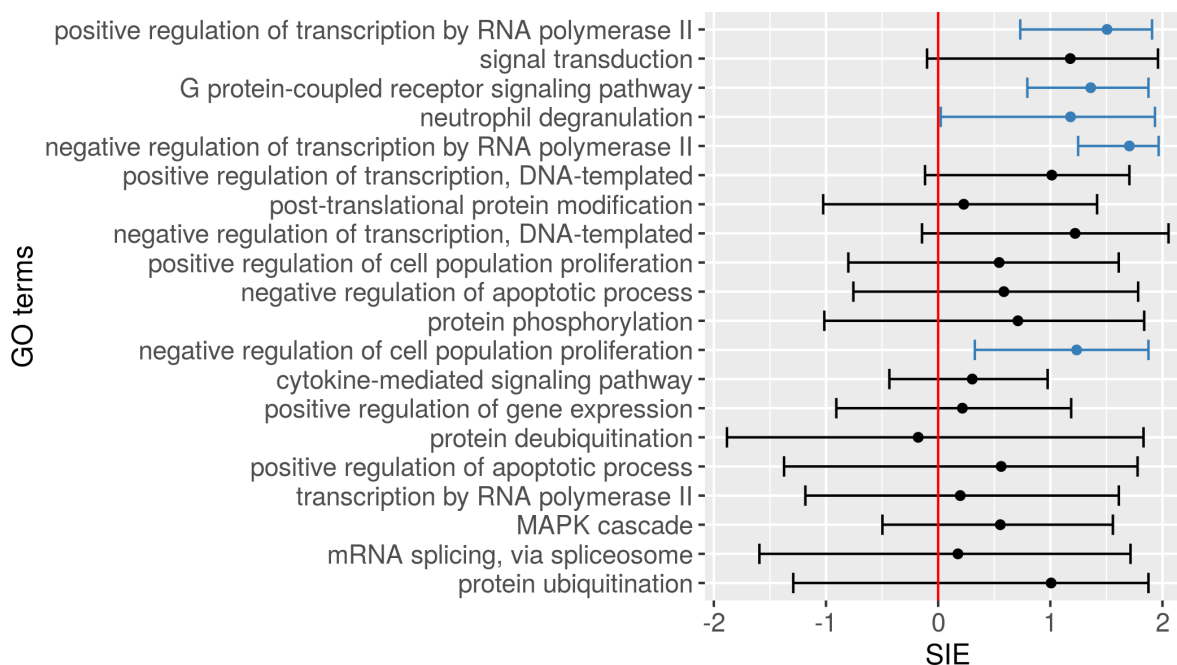

Figure 6: **SIE of functional gene groups.** SIEs and 95% credible intervals obtained for each group of genes associated with the top 20 GO BPO terms. For each group of genes, both intra-chromosomal and inter-chromosomal HiC interactions are included. The GO terms are ranked by the number of genes they annotate in decreasing order from top to bottom. Meaningful spatial dependencies are marked in blue.

164 The interpretation of these positive results is the interplay of the three important factors of a gene: its spatial location,  
165 its expression level and its function. A positive SIE for a functional gene group means that genes that are part of this  
166 particular biological process have co-dependent expression levels based on their spatial locations. In order for these  
167 genes to carry out the same function together, regulation of the expression of these genes takes advantage of the 3D  
168 genome structure.

## 169 2.5 Cell line difference

170 We replicated intra-chromosomal and inter-chromosomal PhiMRF analyses in another cell line, GM12878. From  
171 Differential Expression (DE) analysis using DESeq2 [27], the two cell lines shows different expression landscape  
172 (Supplementary Figure S6). About half of the genes in each chromosome are differentially expressed (Supplementary  
173 Table S7), summing to a total of 10,812 DE genes. The HiC network structures for the two cell lines are also different.  
174 We acquired the *combined* HiC contact matrices containing both primary and replicate HiC experiments. Under the  
175 same edge inference criteria (Methods), the GM12878 HiC networks contains about twice more edges than the IMR90  
176 networks (Supplementary Table S7). Edges in GM12878 covers all of the edges in IMR90 while adding a lot more  
177 others, giving the networks much higher density (Supplementary Figures S7a and S7b, top).

178 Despite the differential expression and different network structures, we observe similar patterns of spatial dependency  
179 in the GM12878 cell line. Eight chromosomes: 1, 4, 5, 11, 14, 15, 21 and X show meaningful spatial dependency, with  
180 significant larger SIE's than their linear counterparts (Supplementary Figure S7a).

181 Chromosomes 1, 4, 5, 21 and X showed meaningful spatial dependency in both cell lines, indicating that this regulation  
182 mechanism may be common and essential among all cell lines and tissue types. These five chromosomes are not  
183 different from other chromosomes in terms of gene count, edge ratio or number of DE genes. More experiments are  
184 need to determine if there is anything special about these five chromosomes. For those chromosomes that did not show  
185 meaningful intra-chromosomal spatial dependency in GM12878, they exhibited large credible intervals, due to the  
186 large number of edges, making the dependencies less concentrated and hence harder to detect. In both cell lines, the  
187 same structure underlines the linear gene networks. Both cell lines exhibit meaningful and consistent linear spatial  
188 dependency across all chromosomes, suggesting that the mechanism of coordinated expression in linear neighboring  
189 genes is still preserved even when the expression levels are different for these genes.

190 In terms of inter-chromosomal dependencies, only 60 (23%) out of the 253 chromosome pairs showed spatial dependency  
191 in GM12878, significantly less ( $p < 0.01$ , test of proportions, two-sided) than that of IMR90 (Supplementary Figure S8).  
192 However, the top ten most significant pairs reveals some familiar chromosomes. For example, chromosome 19 appeared  
193 three times in the top ten list of most spatially dependent chromosome pairs in GM12878, as was the case in IMR90.

### 194 **3 Discussion**

195 We have developed a novel probabilistic model for gene expression incorporating spatial dependency. By applying  
196 this model to RNA-seq and HiC data, we get our first peek into how the transcriptome is shaped by the 3D location  
197 of the genes. The different expression levels of genes can be partially explained by the spatial location of the genes.  
198 The quantitative measurement of such effects provides unprecedented insight into the relationship and interplay among  
199 chromosomal organization, gene expression and functionality.

200 **Insulating effects of TADs** It has been shown that TADs play a role in the regulation of gene expression [18]. For  
201 example, the expression profiles of genes whose promoters are located within the same TAD are more correlated during  
202 cell differentiation than those of genes not in the same TAD [36]. One hypothesis is the regulation is weakened by  
203 the insulating effects of TAD boundaries. TAD boundaries are enriched with CTCF proteins and CTCF binding sites,  
204 which are known to help shape the structure of the genome [18]. Our study confirms that the expression of intra-TAD  
205 genes shows spatial dependency on a global scale, strengthening the hypothesis that TADs are an integral part of the  
206 gene expression regulation mechanism. Interestingly, since we are able to examine the 3D spatial interactions within  
207 each TAD, we discovered that for eight chromosomes, spatial dependency is only detectable when the interactions are  
208 confined to TADs (Figure 3b). If we include only inter-TAD edges (interactions between two genes on two different  
209 TADs), we observe meaningful spatial dependency only in five chromosomes, compared with seventeen chromosomes  
210 for intra-TAD edges (Supplementary Figure S3). All edges present in the HiC gene network represent spatial proximity

211 of these genes in the 3D space. However, if some of these edges are insulated or blocked by boundary elements such as  
212 CTCF proteins, then it makes sense that the spatial dependency of gene expression is no longer detectable when we  
213 include these edges. Even though genes connected by these inter-TAD edges are still spatially close, their expression  
214 are no longer coordinated due to the insulating effect of TAD boundaries.

215 **High inter-chromosomal dependency** The rapid pace of development of Chromosome Conformation Capture (3C)  
216 technology enables us to obtain detailed understanding of intra-chromosomal architecture that shapes the regulatory  
217 landscape of the genome, but inter-chromosomal interactions and their functions are studied less and still poorly  
218 understood [40]. Many known inter-chromosomal interactions are not detected by HiC experiments, although they  
219 can be as stable as intra-chromosomal contacts [41]. Maass *et al* reasoned that the lack of significant detection of  
220 the inter-chromosomal interactions is due to the different distance scale of the inter- versus the intra-chromosomal  
221 ones [41]. We acknowledge the bias that the HiC technique has against inter-chromosomal interactions. To mitigate this  
222 bias, we used a high resolution (10kb) HiC interaction map, together with the soft thresholding of HiC interactions. The  
223 high resolution map enabled us to pool information from several loci for one gene, while the soft thresholding allowed  
224 us to infer a high interaction frequency based on individual chromosome pairs and not any absolute distance across the  
225 genome. However, even with such measures, network density is still lower for gene networks of inter-chromosomal  
226 pairs than for intra-chromosomal gene networks (Supplementary Figure S5), demonstrating the need for caution when  
227 using and interpreting HiC data. Despite the relative low network density for inter-chromosomal HiC gene networks,  
228 we were able to observe high inter-chromosomal spatial dependency in gene expression for the majority (87.35%) of  
229 chromosomal pairs in IMR90 cells (Figure 5). These results suggest extremely long-range and intra-chromosomal gene  
230 interactions on different chromosomes as a commonly occurring regulation mechanism for gene expression.

231 In summary, we have developed a hierarchical Markov random field (PhiMRF) model to explain the variation in gene  
232 expression. PhiMRF can be further applied to gene groups that are functionally enriched, genes in the same biological  
233 pathway, genes that are causal for a certain disease or phenotype, and so on. In doing so, we are essentially looking  
234 at the regulation mechanism for such gene groups to perform a function or set of functions. A meaningful spatial  
235 dependency would indicate that the regulation of such function or disease involves the 3D genome architecture as one  
236 of the regulation mechanisms, allowing biologists to explore new directions when studying the functions, pathways or  
237 diseases of interest.

## 238 **4 Methods**

239 The gene expression data used in this study comes from the ENCODE project (<https://www.encodeproject.org>)  
240 with the following identifiers ENCF353SBP and ENCF496RIW for IMR90 and ENCF680ZFZ and ENCF781YWT  
241 for GM12878. These are each two biological replicates of total RNA-seq experiments on the IMR90 and GM12878 cell  
242 lines. Genes are mapped to Ensembl stable IDs with coordinates from Ensembl release 90, which uses the GRCh38.p10  
243 human genome assembly.

## 244 4.1 Bayesian Inference

The goal of our Bayesian framework is to simulate from the posterior distributions  $p(\alpha|\mathbf{y})$ ,  $p(\eta|\mathbf{y})$  and  $p(\tau^2|\mathbf{y})$ . The properties of these distributions directly answer the biological questions from which we abstracted the stochastic model. The overall strategy is to simulate from the joint posterior distribution of  $p(\alpha, \eta, \tau^2, \mathbf{w}|\mathbf{y})$  using a Gibbs sampler, where we sequentially simulate from each of the full conditional posteriors of our parameters as follows.

$$\begin{aligned} p(\alpha|\mathbf{w}, \eta, \tau^2, \mathbf{y}) &\propto \pi(\alpha)g(\mathbf{w}, \alpha, \eta, \tau^2), \\ p(\eta|\mathbf{w}, \alpha, \tau^2, \mathbf{y}) &\propto \pi(\eta)g(\mathbf{w}, \alpha, \eta, \tau^2), \\ p(\tau^2|\mathbf{w}, \alpha, \eta, \mathbf{y}) &\propto \pi(\tau^2)g(\mathbf{w}, \alpha, \eta, \tau^2), \\ p(\mathbf{w}|\alpha, \eta, \tau^2, \mathbf{y}) &\propto g(\mathbf{w}|\alpha, \eta, \tau^2)f(\mathbf{y}|\mathbf{w}), \end{aligned}$$

245 where  $\pi(\alpha)$ ,  $\pi(\eta)$  and  $\pi(\tau^2)$  are Uniform prior distributions,  $f(\mathbf{y}|\mathbf{w})$  is the Poisson distribution for observed data  $\mathbf{y}$ ,  
246 and  $g(\mathbf{w}|\alpha, \eta, \tau^2)$  is the marginal distribution for  $\mathbf{w}$ . This marginal distribution is not readily available from our model  
247 specification, since  $\mathbf{w}$  is only conditionally specified. However, it can be constructed from the conditional distributions  
248 using a negpotential function [42] (Supplementary Methods). Moreover, the negpotential introduces an intractable  
249 constant to the posterior that cannot be dropped, so we use the *double* Metropolis-Hastings algorithm to simulate from  
250 these posteriors (Supplementary Methods).

251 **Prior distributions** The prior used for  $\alpha$  is a Uniform distribution  $U(-10, 10)$ . The prior used for  $\eta$  is a Uniform  
252 distribution over the parameter space of  $\eta$ . The parameter space of  $\eta$  is directly calculated from the neighborhood  
253 adjacency matrix, as the inverse maximum and minimum of its eigenvalues (Supplementary Methods). We assume  
254 that  $\tau$  follows a prior uniform distribution  $U(0, 10)$  and derive the prior distribution for  $\tau^2$  in the model as  $\pi(\tau^2) =$   
255  $\frac{1}{20\tau} \mathbb{1}(0 < \tau^2 < 100)$ .

256 **Iterations** For each intra-chromosomal (including the linear baseline) and pairwise inter-chromosomal HiC dataset,  
257 we ran the double Metropolis-Hastings algorithm through 5000 iterations, with 1000 burn-in iterations. All TAD related  
258 datasets, the whole-genome dataset and the functional datasets went through 2000 iterations with 400 burn-in. The  
259 variances for the jump proposal distributions (Supplementary Methods) were chosen through multiple rounds of initial  
260 testing to ensure that the jump frequencies fall within 15% to 40% for randomly selected datasets in each group of  
261 datasets, and that the MCMC simulations converge within the number of iterations used.

## 262 4.2 HiC Data processing

263 **Normalization** Raw observed HiC data for the IMR90 and GM12878 cell from Rao *et al*[17] with 10kb resolution  
264 were used. The KR normalization technique was applied. The goal of the normalization is to remove one-dimensional  
265 bias in HiC counts. On Chromosome 9 of IMR90 at this resolution, the KR algorithm did not converge on that particular

266 matrix, this is likely due to sparsity of the matrix. In this case raw counts are used. Interactions between the same locus  
267 are eliminated to avoid bias towards neighboring genes.

268 **Gene Mapping** Interactions are observed for every consecutive 10k bins (loci) on the entire human genome (except  
269 chromosome Y), while expression are generally considered for genes located intermittently on the genome. Since each  
270 bin is 10kb in size, one gene is often mapped to multiple bins. The interaction between two genes is then decided by all  
271 of the interacting bins that overlap with the pair of genes. An overlap is when a bin shares more than 10% of base pairs  
272 with a gene (Supplementary Figure S1). For example, if gene 1 overlaps with bin A and bin B, while gene 2 overlaps  
273 with bins C, D and E, then the interaction between gene 1 and gene 2 are considered as the pool of interactions A-C,  
274 A-D, A-E, B-C, B-D and B-E. The goal of such gene-bin mapping is to inform a gene network where edges connect  
275 gene pairs that are close in 3D space while eliminating potential bias from individual loci. We found that most gene  
276 pairs overlap with a pool of less than five bin pairs, for both intra-chromosomal and inter-chromosomal gene pairs.  
277 Therefore, we adopted simple metrics to summarize these pools of interactions instead of using more complicated  
278 parametrizations (e.g. a t test). Four metrics are considered, mean, median, max and min to summarize this pool of  
279 interactions. The computed metric for each pair of genes is then compared to a threshold to decide whether two genes  
280 are neighbors.

281 **Soft threshold** The mean (median, max or min) of the pool of interactions for a gene pair is compared with a threshold  
282 to determine whether there is an edge between the gene pair. The higher the interaction score, the closer in proximity.  
283 The threshold is determined as a 90% quantile of *all* locus-locus interactions found in that chromosome or chromosome  
284 pair. Therefore, the threshold changes from chromosome to chromosome, eliminating chromosomal bias. Out of the  
285 four metrics, the min metric is the most conservative, as it requires that all interactions in the pool be larger than the  
286 threshold, to consider the gene pair to be neighbors, while the max metric only requires that one interaction out of the  
287 pool be larger than the threshold. Mean is our main metric, and all subsequent studies presented in the main text uses  
288 the mean metric. Intra-chromosomal datasets are repeated using the other three metrics (median, min and max) as well  
289 and presented in Supplementary Tables S9, S10 and S11.

### 290 **4.3 Functional Annotations**

291 We used the UniProt Gene Ontology Annotation (downloaded on September 16, 2019) to extract all Gene Ontology  
292 BPO terms annotating human gene products. We only extracted the annotations with experimental evidence, with the  
293 following evidence codes: EXP, IDA, IPI, IMP, IGI, IEP, TAS and IC. When counting the most annotated terms, we  
294 decided to *not* propagate the annotations through the hierarchical structure of the ontology. An example of a propagation  
295 is where the ontology structure specifies that *carbohydrate phosphorylation* (GO:0046835) "is a" *phosphorylation*  
296 (GO:0016310). If a protein is annotated with the former, a more informative term, then it is automatically annotated  
297 with the latter, a less informative term. Since we are ranking the GO terms by the number of proteins they annotate, if  
298 the annotations are propagated, the top ones will be the very general functions like "cellular process", that are in general

299 not of interest to researchers (Supplementary Table S5). Therefore, we have elected to rank the GO terms by the number  
300 of proteins they directly annotate. These leaf annotations are directly curated from published experiments, which is  
301 evidence that these terms are of interest to some researchers.

#### 302 **4.4 Data and software availability**

303 The source code, prerequisites and installation guide, as well as a Docker image for the R package PhiMRF are available  
304 at <https://github.com/ashleyzhou972/PhiMRF> under GPL-2 license.

305 The scripts for data processing are available at <https://github.com/ashleyzhou972/bioMRF> under a GPL-2  
306 license.

307 Full intermediate and final results are available at <https://doi.org/10.6084/m9.figshare.11357321.v4>.

## 308 References

- 309 [1] Christian Lanctôt, Thierry Cheutin, Marion Cremer, Giacomo Cavalli, and Thomas Cremer. Dynamic genome  
310 architecture in the nuclear space: regulation of gene expression in three dimensions. *Nature Reviews Genetics*,  
311 8(2):104, 2007.
- 312 [2] Robert Schneider and Rudolf Grosschedl. Dynamics and interplay of nuclear architecture, genome organization,  
313 and gene expression. *Genes & development*, 21(23):3027–3043, 2007.
- 314 [3] Boyan Bonev and Giacomo Cavalli. Organization and function of the 3d genome. *Nature Reviews Genetics*,  
315 17(11):661, 2016.
- 316 [4] Anton Krumm and Zhijun Duan. Understanding the 3d genome: Emerging impacts on human disease. In *Seminars*  
317 *in cell & developmental biology*, volume 90, pages 62–77. Elsevier, 2019.
- 318 [5] Konstantinos Sofiadis and Argyris Papantonis. Transcription factories as spatial and functional organization nodes.  
319 In *Nuclear Architecture and Dynamics*, pages 283–296. Elsevier, 2018.
- 320 [6] Cameron S Osborne, Lyubomira Chakalova, Karen E Brown, David Carter, Alice Horton, Emmanuel Debrand,  
321 Beatriz Goyenechea, Jennifer A Mitchell, Susana Lopes, Wolf Reik, et al. Active genes dynamically colocalize to  
322 shared sites of ongoing transcription. *Nature genetics*, 36(10):1065, 2004.
- 323 [7] Peter R Cook. A model for all genomes: the role of transcription factories. *Journal of molecular biology*,  
324 395(1):1–10, 2010.
- 325 [8] Robert A Beagrie, Antonio Scialdone, Markus Schueler, Dorothee CA Kraemer, Mita Chotalia, Sheila Q Xie,  
326 Mariano Barbieri, Inês de Santiago, Liron-Mark Lavitas, Miguel R Branco, et al. Complex multi-enhancer contacts  
327 captured by genome architecture mapping. *Nature*, 543(7646):519, 2017.
- 328 [9] Biola M Javierre, Oliver S Burren, Steven P Wilder, Roman Kreuzhuber, Steven M Hill, Sven Sewitz, Jonathan  
329 Cairns, Steven W Wingett, Csilla Várnai, Michiel J Thiecke, et al. Lineage-specific genome architecture links  
330 enhancers and non-coding disease variants to target gene promoters. *Cell*, 167(5):1369–1384, 2016.
- 331 [10] Stephanie Fanucchi, Youtaro Shibayama, Shaun Burd, Marc S Weinberg, and Musa M Mhlanga. Chromosomal  
332 contact permits transcription between coregulated genes. *Cell*, 155(3):606–620, 2013.
- 333 [11] Fulai Jin, Yan Li, Jesse R Dixon, Siddarth Selvaraj, Zhen Ye, Ah Young Lee, Chia-An Yen, Anthony D Schmitt,  
334 Celso A Espinoza, and Bing Ren. A high-resolution map of the three-dimensional chromatin interactome in  
335 human cells. *Nature*, 503(7475):290, 2013.
- 336 [12] Stefan Schoenfelder, Mayra Furlan-Magaril, Borbala Mifsud, Filipe Tavares-Cadete, Robert Sugar, Biola-Maria  
337 Javierre, Takashi Nagano, Yulia Katsman, Moorthy Sakthidevi, Steven W Wingett, et al. The pluripotent regulatory  
338 circuitry connecting promoters to their long-range interacting elements. *Genome research*, 25(4):582–597, 2015.
- 339 [13] Job Dekker, Karsten Rippe, Martijn Dekker, and Nancy Kleckner. Capturing chromosome conformation. *science*,  
340 295(5558):1306–1311, 2002.



- 341 [14] Daan Noordermeer, Marion Leleu, Erik Splinter, Jacques Rougemont, Wouter De Laat, and Denis Duboule. The  
342 dynamic architecture of hox gene clusters. *Science*, 334(6053):222–225, 2011.
- 343 [15] Marieke Simonis, Petra Klous, Erik Splinter, Yuri Moshkin, Rob Willemsen, Elzo De Wit, Bas Van Steensel,  
344 and Wouter De Laat. Nuclear organization of active and inactive chromatin domains uncovered by chromosome  
345 conformation capture–on-chip (4c). *Nature genetics*, 38(11):1348, 2006.
- 346 [16] Erez Lieberman-Aiden, Nynke L Van Berkum, Louise Williams, Maxim Imakaev, Tobias Ragoczy, Agnes Telling,  
347 Ido Amit, Bryan R Lajoie, Peter J Sabo, Michael O Dorschner, et al. Comprehensive mapping of long-range  
348 interactions reveals folding principles of the human genome. *science*, 326(5950):289–293, 2009.
- 349 [17] Suhas SP Rao, Miriam H Huntley, Neva C Durand, Elena K Stamenova, Ivan D Bochkov, James T Robinson,  
350 Adrian L Sanborn, Ido Machol, Arina D Omer, Eric S Lander, et al. A 3d map of the human genome at kilobase  
351 resolution reveals principles of chromatin looping. *Cell*, 159(7):1665–1680, 2014.
- 352 [18] Jesse R Dixon, Siddarth Selvaraj, Feng Yue, Audrey Kim, Yan Li, Yin Shen, Ming Hu, Jun S Liu, and Bing  
353 Ren. Topological domains in mammalian genomes identified by analysis of chromatin interactions. *Nature*,  
354 485(7398):376, 2012.
- 355 [19] Thomas Cremer and Marion Cremer. Chromosome territories. *Cold Spring Harbor perspectives in biology*,  
356 2(3):a003889, 2010.
- 357 [20] Przemyslaw Szalaj and Dariusz Plewczynski. Three-dimensional organization and dynamics of the genome. *Cell*  
358 *biology and toxicology*, 34(5):381–404, 2018.
- 359 [21] Darío G Lupiáñez, Katerina Kraft, Verena Heinrich, Peter Krawitz, Francesco Brancati, Eva Klopocki, Denise  
360 Horn, Hülya Kayserili, John M Opitz, Renata Laxova, et al. Disruptions of topological chromatin domains cause  
361 pathogenic rewiring of gene-enhancer interactions. *Cell*, 161(5):1012–1025, 2015.
- 362 [22] Dirar Homouz and Andrzej S Kudlicki. The 3d organization of the yeast genome correlates with co-expression  
363 and reflects functional relations between genes. *PloS one*, 8(1):e54699, 2013.
- 364 [23] Sepideh Babaei, Ahmed Mahfouz, Marc Hulsman, Boudewijn PF Lelieveldt, Jeroen de Ridder, and Marcel  
365 Reinders. Hi-c chromatin interaction networks predict co-expression in the mouse cortex. *PLoS computational*  
366 *biology*, 11(5):e1004221, 2015.
- 367 [24] Li Liu, Qian-Zhong Li, Wen Jin, Hao Lv, and Hao Lin. Revealing gene function and transcription relationship by  
368 reconstructing gene-level chromatin interaction. *Computational and structural biotechnology journal*, 17:195–205,  
369 2019.
- 370 [25] Gordon K Smyth. Limma: linear models for microarray data. In *Bioinformatics and computational biology*  
371 *solutions using R and Bioconductor*, pages 397–420. Springer, 2005.
- 372 [26] Mark D Robinson, Davis J McCarthy, and Gordon K Smyth. edgeR: a bioconductor package for differential  
373 expression analysis of digital gene expression data. *Bioinformatics*, 26(1):139–140, 2010.

- 374 [27] Michael I Love, Wolfgang Huber, and Simon Anders. Moderated estimation of fold change and dispersion for  
375 rna-seq data with *deseq2*. *Genome biology*, 15(12):550, 2014.
- 376 [28] Yanli Wang, Fan Song, Bo Zhang, Lijun Zhang, Jie Xu, Da Kuang, Daofeng Li, Mayank NK Choudhary, Yun  
377 Li, Ming Hu, et al. The 3d genome browser: a web-based browser for visualizing 3d genome organization and  
378 long-range chromatin interactions. *Genome biology*, 19(1):151, 2018.
- 379 [29] Mélina Gallopin, Andrea Rau, and Florence Jaffrézic. A hierarchical poisson log-normal model for network  
380 inference from rna sequencing data. *PloS one*, 8(10):e77503, 2013.
- 381 [30] Alexandra Despang, Robert Schöpflin, Martin Franke, Salaheddine Ali, Ivana Jerkovic, Christina Paliou, Wing-Lee  
382 Chan, Bernd Timmermann, Lars Wittler, Martin Vingron, et al. Functional dissection of tads reveals non-essential  
383 and instructive roles in regulating gene expression. 2019.
- 384 [31] Mattia Forcato, Chiara Nicoletti, Koustav Pal, Carmen Maria Livi, Francesco Ferrari, and Silvio Bicciato.  
385 Comparison of computational methods for hi-c data analysis. *Nature methods*, 14(7):679, 2017.
- 386 [32] Stanley Wasserman, Katherine Faust, et al. *Social network analysis: Methods and applications*, volume 8.  
387 Cambridge university press, 1994.
- 388 [33] Thomas Cremer and Christoph Cremer. Chromosome territories, nuclear architecture and gene regulation in  
389 mammalian cells. *Nature reviews genetics*, 2(4):292, 2001.
- 390 [34] Tim J Stevens, David Lando, Srinjan Basu, Liam P Atkinson, Yang Cao, Steven F Lee, Martin Leeb, Kai J  
391 Wohlfahrt, Wayne Boucher, Aoife O’Shaughnessy-Kirwan, et al. 3d structures of individual mammalian genomes  
392 studied by single-cell hi-c. *Nature*, 544(7648):59, 2017.
- 393 [35] Miguel R Branco and Ana Pombo. Intermingling of chromosome territories in interphase suggests role in  
394 translocations and transcription-dependent associations. *PLoS biology*, 4(5):e138, 2006.
- 395 [36] Elphège P Nora, Bryan R Lajoie, Edda G Schulz, Luca Giorgetti, Ikuhiro Okamoto, Nicolas Servant, Tristan  
396 Piolot, Nynke L van Berkum, Johannes Meisig, John Sedat, et al. Spatial partitioning of the regulatory landscape  
397 of the x-inactivation centre. *Nature*, 485(7398):381, 2012.
- 398 [37] S Kozubek, E Lukášová, A Marečková, M Skalnikova, M Kozubek, E Bartova, V Kroha, E Krahulcova, and  
399 J Šlotová. The topological organization of chromosomes 9 and 22 in cell nuclei has a determinative role in the  
400 induction of t (9, 22) translocations and in the pathogenesis of t (9, 22) leukemias. *Chromosoma*, 108(7):426–435,  
401 1999.
- 402 [38] Andreas Bolzer, Gregor Kreth, Irina Solovei, Daniela Koehler, Kaan Saracoglu, Christine Fauth, Stefan Müller,  
403 Roland Eils, Christoph Cremer, Michael R Speicher, et al. Three-dimensional maps of all chromosomes in human  
404 male fibroblast nuclei and prometaphase rosettes. *PLoS biology*, 3(5):e157, 2005.
- 405 [39] Annelise Thévenin, Liat Ein-Dor, Michal Ozery-Flato, and Ron Shamir. Functional gene groups are concentrated  
406 within chromosomes, among chromosomes and in the nuclear space of the human genome. *Nucleic acids research*,  
407 42(15):9854–9861, 2014.

- 408 [40] Philipp G Maass, A Rasim Barutcu, and John L Rinn. Interchromosomal interactions: A genomic love story of  
409 kissing chromosomes. *The Journal of Cell Biology*, 218(1):27–38, 2019.
- 410 [41] Philipp G Maass, A Rasim Barutcu, Catherine L Weiner, and John L Rinn. Inter-chromosomal contact properties  
411 in live-cell imaging and in hi-c. *Molecular cell*, 69(6):1039–1045, 2018.
- 412 [42] Mark S Kaiser and Noel Cressie. The construction of multivariate distributions from markov random fields.  
413 *Journal of Multivariate Analysis*, 73(2):199–220, 2000.
